# Supplementary material for: Mesenchymal Stem Cells Delivered Locally to Ischemia-Reperfused Kidneys via Injectable Hyaluronic Acid Hydrogels Decrease Extracellular Matrix Remodeling 1 Month after Injury in Male Mice
Source: MDPI journal article supplement (doi:10.3390/cells12131771), 2023-07-04
Supplement: s1 [file s1]

## Supplementary Materials:

### Supplemental Figure S1:

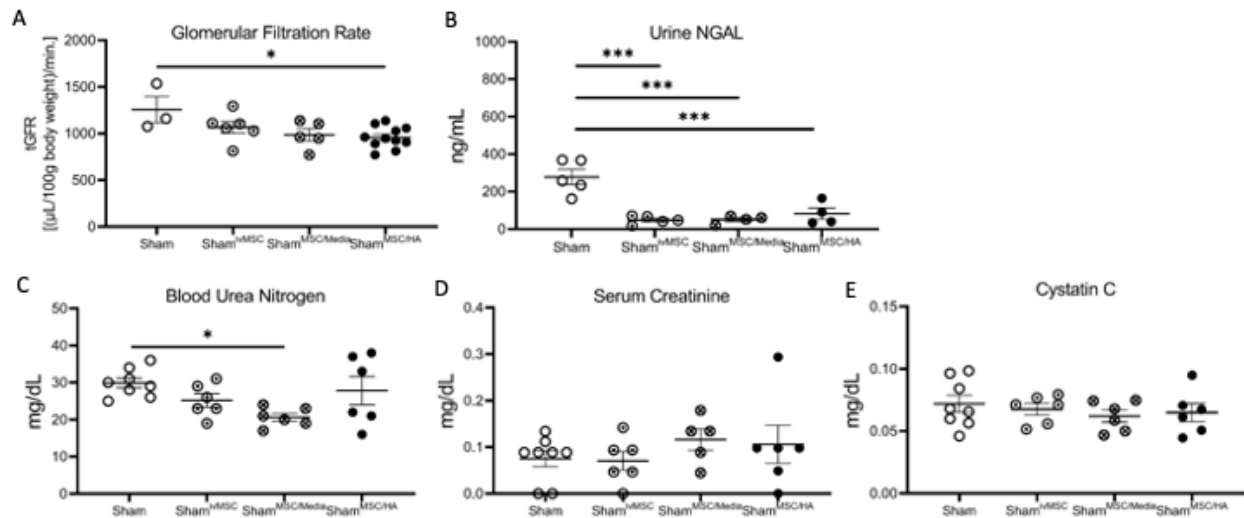

### Supplemental Figure S1 Legend:

Renal functional outcomes at sacrifice, 1 month after sham bilateral ischemia-reperfusion acute kidney injury. Groups received treatment of either MSCs via iv (Sham<sup>MSCiv</sup>), MSCs injected under the left kidney capsule (Sham<sup>MSC/media</sup>) or MSCs encapsulated in HA hydrogel delivered under the left kidney capsule (Sham<sup>MSC/HA</sup>) 3 days after AKI. Measured tGFR (A), Urine NGAL (B), blood urea nitrogen (C), serum Creatinine (D) and serum cystatin C (E). \* indicates  $p < 0.05$ , \*\* indicates  $p < 0.01$ ; \*\*\* indicates  $p < 0.001$ .

## Supplemental Figure S2:

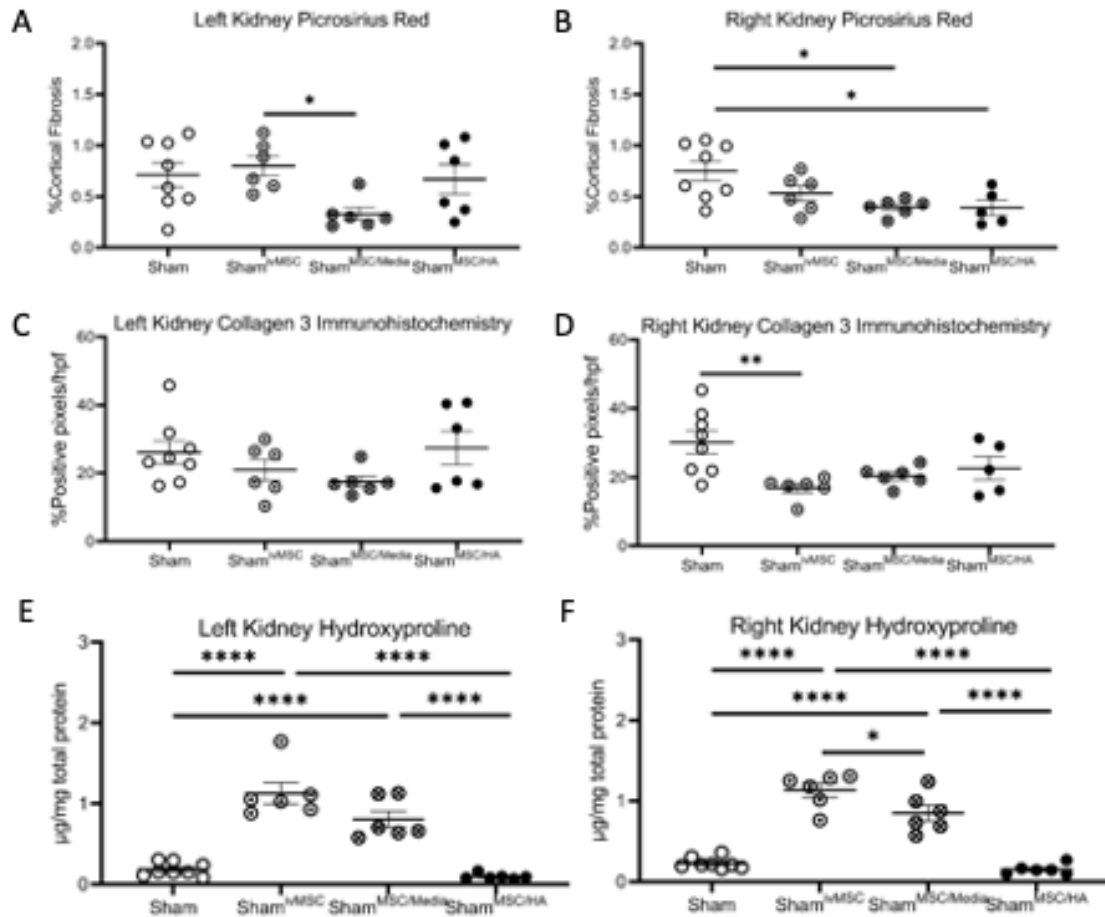

**Supplemental Figure S2 Legend:** : Kidney fibrosis outcomes at sacrifice, 1 month after sham bilateral ischemia-reperfusion acute kidney injury in the various treatment groups.

Quantification of cortical fibrosis via polarized light after Picrosirius Red staining in the left (A) and right (B) kidneys. Quantification of immunohistochemistry staining for Collagen 3 in the left (C) and right (D) kidneys. Hydroxyproline content of the left (E) and right (F) kidneys. The sham treatment groups demonstrate that MSCs delivered via HA did not result in kidney fibrosis. \* indicates  $p < 0.05$ , \*\* indicates  $p < 0.01$ , \*\*\*\* indicates  $p < 0.0001$ .

## Supplemental Figure S3:

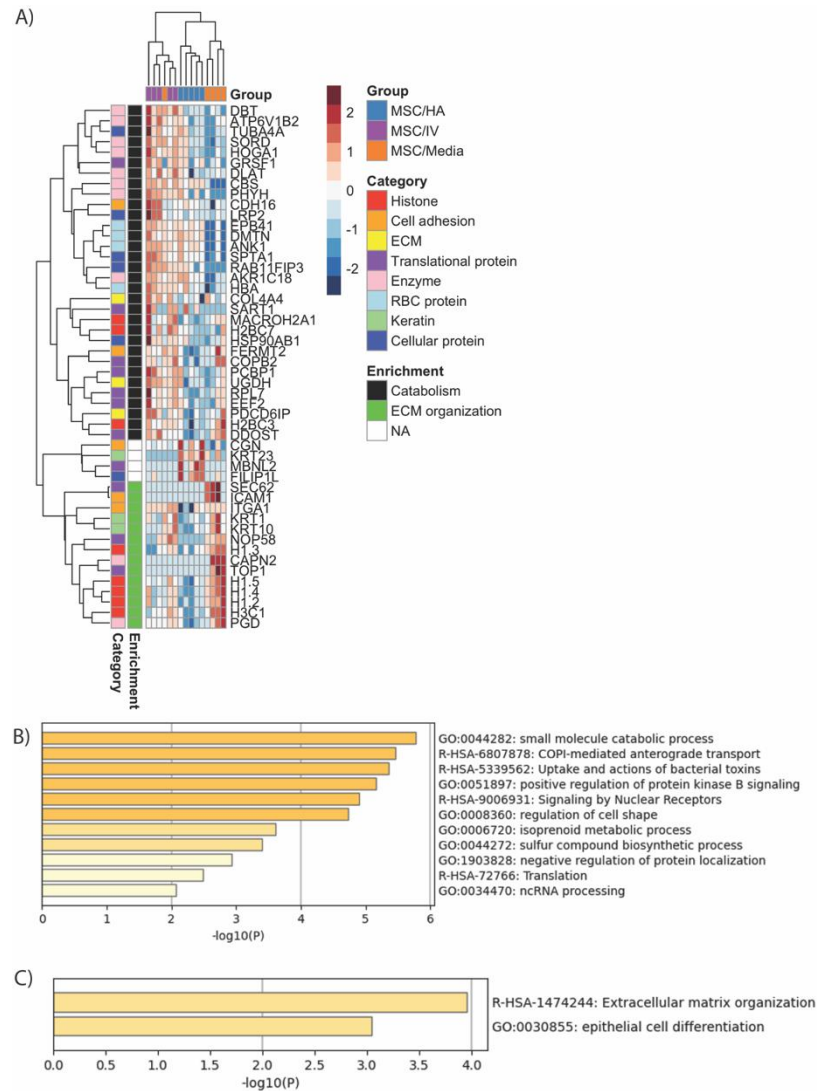

**Supplemental Figure S3 Legend:** A). Heatmap showing grouping of treated kidneys (X-axis) according to their relative levels of significant proteins also colored by general protein category (Y-axis). Also colored by enrichment of proteins by treatment group from B) and C). B) Enrichment results of proteins expressed at significantly elevated levels in MSC/IV treated kidneys showing term (Y-axis) and  $-\log_{10}(\text{pvalue})$  (X-axis) based on number of proteins enriched. C) Enrichment terms of proteins expressed elevated levels in MSC/Media treated kidneys.

**A)**

**B)**

R-MMU-1474244: Extracellular matrix organization  
GO:0042730: fibrinolysis  
GO:0097435: supramolecular fiber organization  
R-MMU-1266738: Developmental Biology  
R-MMU-8957275: Post-translational protein phosphorylation  
GO:0009415: response to water  
GO:0045861: negative regulation of proteolysis  
GO:0006826: iron ion transport  
GO:0032956: regulation of actin cytoskeleton organization  
GO:0007009: plasma membrane organization  
GO:007162: negative regulation of cell adhesion  
GO:0071496: cellular response to external stimulus

**C)**

**D)**

R-MMU-1474244: Extracellular matrix organization  
GO:0097435: supramolecular fiber organization  
R-MMU-8957275: Post-translational protein phosphorylation  
R-MMU-8953854: Metabolism of RNA  
mmu05171: Coronavirus disease - COVID-19  
GO:0030193: regulation of blood coagulation  
WP458: inflammatory response pathway  
GO:0031389: cell-substrate adhesion  
WP2573: Primary focal segmental glomerulosclerosis (FSGS)  
R-MMU-194315: Signaling by Rho GTPases  
GO:0010035: response to inorganic substance  
mmu04810: Regulation of actin cytoskeleton  
GO:0034728: nucleosome organization  
GO:0001101: response to acid chemical  
R-MMU-445355: Smooth Muscle Contraction  
GO:0043086: negative regulation of catalytic activity  
R-MMU-75153: Apoptotic execution phase  
GO:0010638: positive regulation of organelle organization  
R-MMU-2129379: Molecules associated with elastic fibres  
GO:0034330: cell junction organization

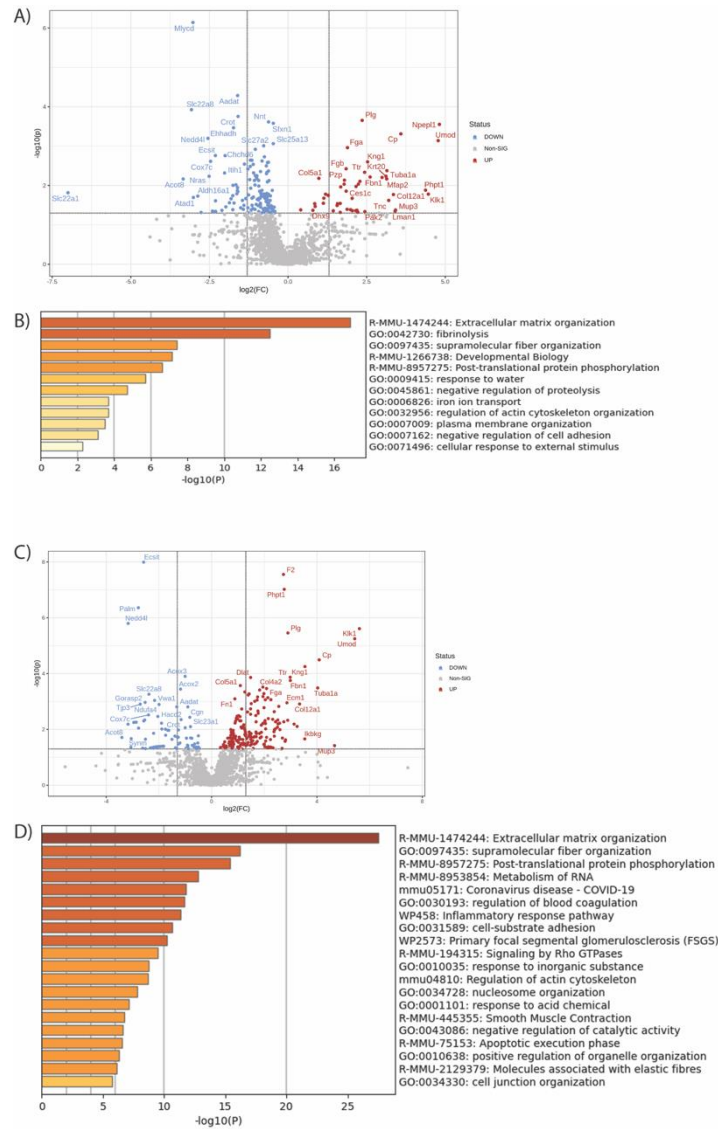

## Supplemental Figure S5:

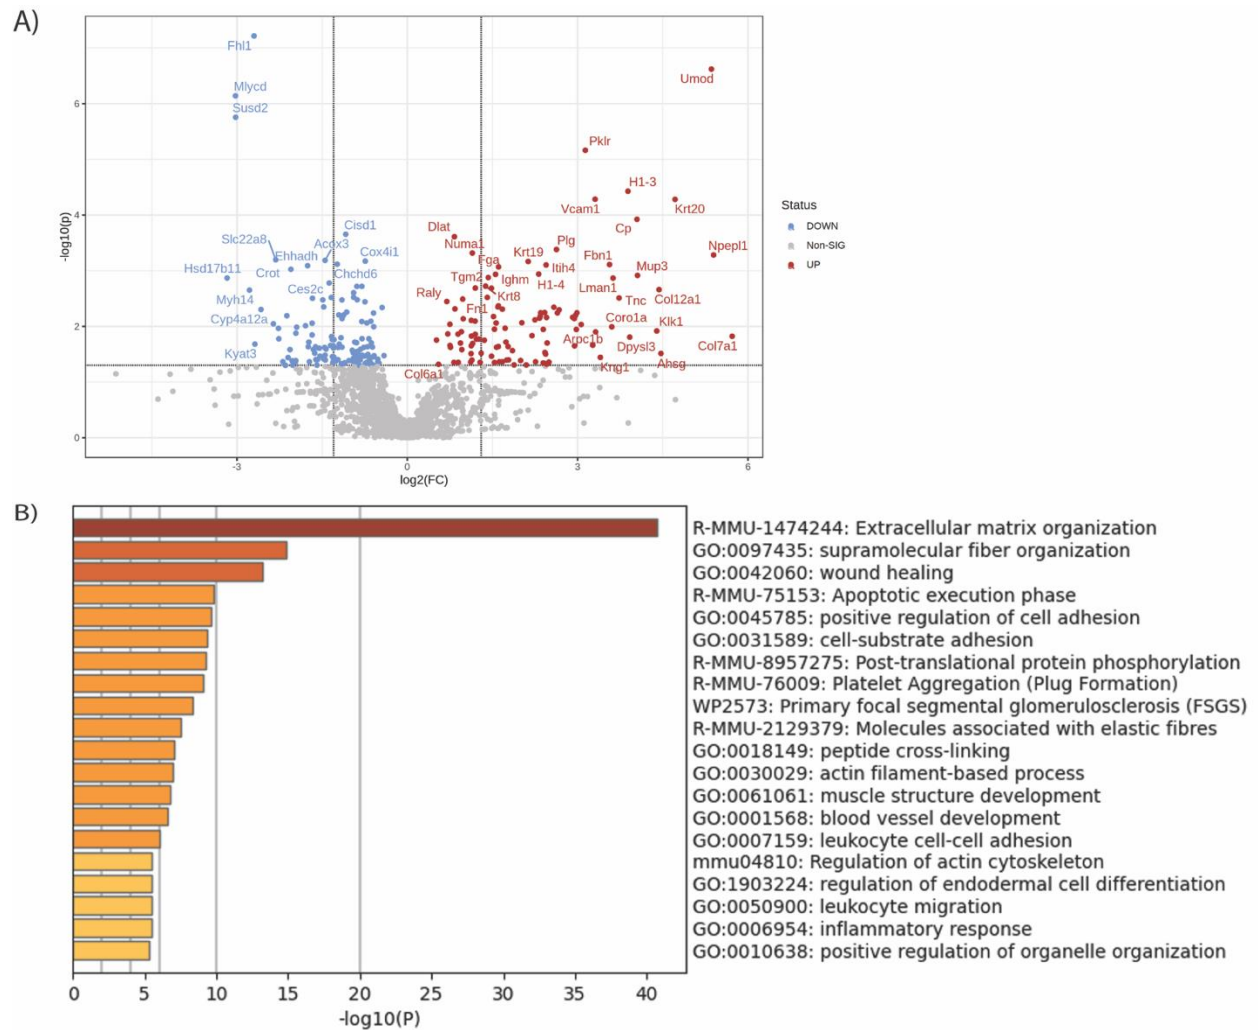

**Supplemental Figure S5 Legend:** A) Volcano plot comparing Sham vs. MSC/media

treated kidneys, with B) enrichment terms of proteins expressed at significantly elevated levels in MSC/media treated kidneys.

## Supplemental Figure S6:

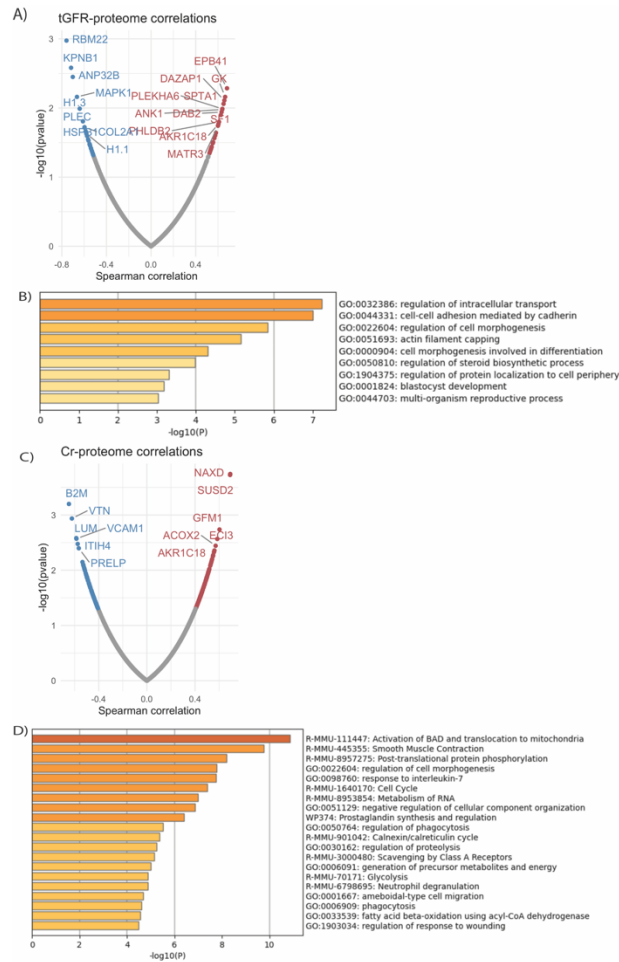

**Supplemental Figure S6:** A) Correlation U-plot of tGFR vs. protein expression levels with spearman correlation value on X-axis and  $-\log_{10}(\text{pvalue})$  on Y-axis showing positively (red) and negatively (blue) correlated proteins with tGFR. B) Enrichment results of significantly and highly correlated proteins with tGFR, showing enrichment terms and  $-\log_{10}(\text{pvalue})$ . C) Correlation U-plot of Creatinine vs. protein expression levels with spearman correlation value on X-axis and  $-\log_{10}(\text{pvalue})$  on Y-axis showing positively (red) and negatively (blue) correlated proteins with Creatinine. D) Enrichment results of significantly and highly correlated proteins with Creatinine, showing enrichment terms and  $-\log_{10}(\text{pvalue})$ .

## Supplemental Figure S7:

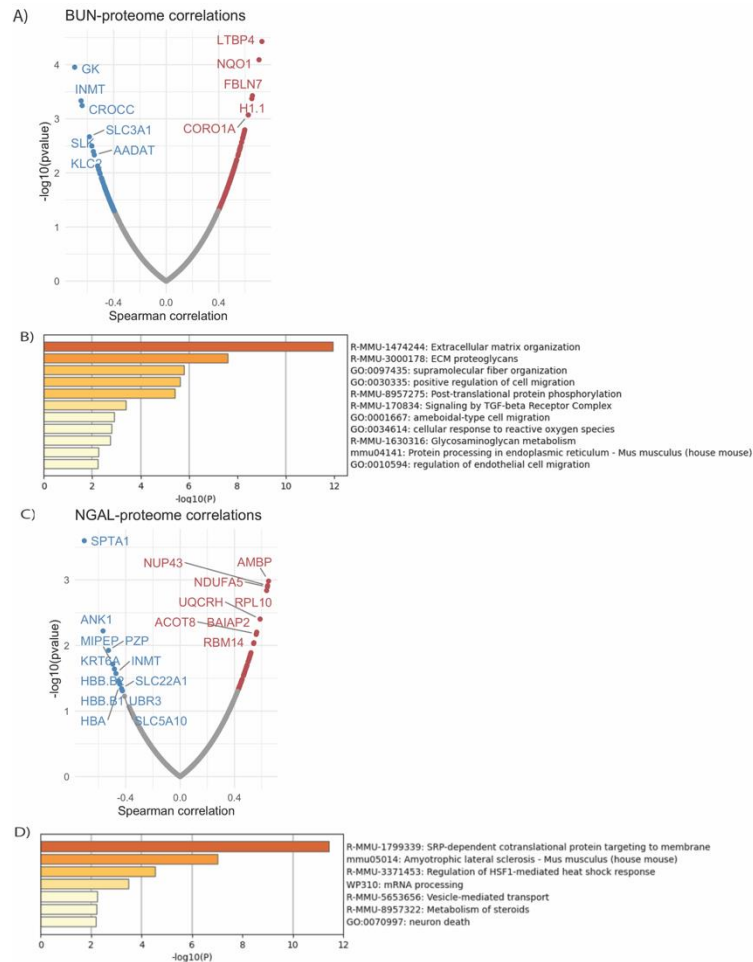

**Supplemental Figure S7:** A) Correlation U-plot of BUN vs. protein expression levels with spearman correlation value on X-axis and  $-\log_{10}(\text{pvalue})$  on Y-axis showing positively (red) and negatively (blue) correlated proteins with BUN. B) Enrichment results of significantly and highly correlated proteins with BUN, showing enrichment terms and  $-\log_{10}(\text{pvalue})$ . C) Correlation U-plot of NGAL vs. protein expression levels with spearman correlation value on X-axis and  $-\log_{10}(\text{pvalue})$  on Y-axis showing positively (red) and negatively (blue) correlated proteins with NGAL. D) Enrichment results of significantly and highly correlated proteins with NGAL, showing enrichment terms and  $-\log_{10}(\text{pvalue})$ .

**Supplemental Table S1: Top 100 significantly different proteins among all groups**

| Protein  | obs.tot | sumsq.between | sumsq.within | statistic | pvalue   | fdr      |
|----------|---------|---------------|--------------|-----------|----------|----------|
| UMOD     | 25      | 20.14         | 3.86         | 26.12     | 1.08E-07 | 1.91E-04 |
| CP       | 25      | 19.87         | 4.13         | 24.04     | 2.13E-07 | 1.91E-04 |
| MLYCD    | 25      | 17.75         | 6.25         | 14.19     | 1.21E-05 | 7.23E-03 |
| TTR      | 25      | 17.20         | 6.80         | 12.65     | 2.72E-05 | 1.22E-02 |
| FBN1     | 25      | 16.64         | 7.36         | 11.31     | 5.81E-05 | 2.09E-02 |
| DLAT     | 25      | 16.32         | 7.68         | 10.64     | 8.73E-05 | 2.61E-02 |
| AMBP     | 25      | 16.06         | 7.94         | 10.12     | 1.20E-04 | 2.75E-02 |
| KRT19    | 25      | 15.88         | 8.12         | 9.78      | 1.49E-04 | 2.75E-02 |
| COL5A1   | 25      | 15.88         | 8.12         | 9.78      | 1.50E-04 | 2.75E-02 |
| H1.4     | 25      | 15.83         | 8.17         | 9.70      | 1.58E-04 | 2.75E-02 |
| APOA4    | 25      | 15.78         | 8.22         | 9.60      | 1.68E-04 | 2.75E-02 |
| COL12A1  | 25      | 15.67         | 8.33         | 9.40      | 1.92E-04 | 2.88E-02 |
| PKLR     | 25      | 15.41         | 8.59         | 8.96      | 2.57E-04 | 3.54E-02 |
| PLG      | 25      | 15.31         | 8.69         | 8.80      | 2.87E-04 | 3.54E-02 |
| ACOT8    | 25      | 15.26         | 8.74         | 8.73      | 3.02E-04 | 3.54E-02 |
| ALB      | 25      | 15.22         | 8.78         | 8.67      | 3.15E-04 | 3.54E-02 |
| CYP4A12A | 25      | 15.13         | 8.87         | 8.52      | 3.48E-04 | 3.57E-02 |
| NEDD4L   | 25      | 15.05         | 8.95         | 8.41      | 3.77E-04 | 3.57E-02 |
| TNC      | 25      | 15.05         | 8.95         | 8.41      | 3.78E-04 | 3.57E-02 |
| SLC22A8  | 25      | 14.89         | 9.11         | 8.17      | 4.50E-04 | 4.04E-02 |
| TUBA1A   | 25      | 14.61         | 9.39         | 7.77      | 5.98E-04 | 5.11E-02 |
| COL3A1   | 25      | 14.44         | 9.56         | 7.56      | 7.02E-04 | 5.74E-02 |
| PDCD6IP  | 25      | 14.35         | 9.65         | 7.43      | 7.71E-04 | 6.00E-02 |
| TOR1AIP1 | 25      | 14.31         | 9.69         | 7.38      | 8.02E-04 | 6.00E-02 |
| NUMA1    | 25      | 14.23         | 9.77         | 7.29      | 8.62E-04 | 6.08E-02 |
| COL1A1   | 25      | 14.18         | 9.82         | 7.22      | 9.10E-04 | 6.08E-02 |
| COX7C    | 25      | 14.17         | 9.83         | 7.21      | 9.14E-04 | 6.08E-02 |
| PZP      | 25      | 14.13         | 9.87         | 7.16      | 9.53E-04 | 6.12E-02 |
| COL1A2   | 25      | 14.09         | 9.91         | 7.11      | 9.87E-04 | 6.12E-02 |
| FGA      | 25      | 14.05         | 9.95         | 7.06      | 1.03E-03 | 6.18E-02 |
| COL5A2   | 25      | 13.90         | 10.10        | 6.88      | 1.19E-03 | 6.60E-02 |
| ATAD1    | 25      | 13.87         | 10.13        | 6.84      | 1.22E-03 | 6.60E-02 |
| CROT     | 25      | 13.84         | 10.16        | 6.81      | 1.25E-03 | 6.60E-02 |
| FGB      | 25      | 13.79         | 10.21        | 6.75      | 1.31E-03 | 6.60E-02 |
| B2M      | 25      | 13.78         | 10.22        | 6.74      | 1.33E-03 | 6.60E-02 |
| FN1      | 25      | 13.76         | 10.24        | 6.72      | 1.34E-03 | 6.60E-02 |



|         |    |       |       |      |          |          |
|---------|----|-------|-------|------|----------|----------|
| EHHADH  | 25 | 13.74 | 10.26 | 6.69 | 1.37E-03 | 6.60E-02 |
| H1.5    | 25 | 13.71 | 10.29 | 6.67 | 1.40E-03 | 6.60E-02 |
| H1.3    | 25 | 13.68 | 10.32 | 6.63 | 1.45E-03 | 6.60E-02 |
| ICAM1   | 25 | 13.66 | 10.34 | 6.61 | 1.47E-03 | 6.60E-02 |
| ECSIT   | 25 | 13.61 | 10.39 | 6.55 | 1.54E-03 | 6.74E-02 |
| SPTA1   | 25 | 13.51 | 10.49 | 6.43 | 1.69E-03 | 7.25E-02 |
| MATN2   | 25 | 13.43 | 10.57 | 6.35 | 1.81E-03 | 7.56E-02 |
| ITIH4   | 25 | 13.36 | 10.64 | 6.27 | 1.93E-03 | 7.89E-02 |
| H1.2    | 25 | 13.31 | 10.69 | 6.22 | 2.01E-03 | 8.04E-02 |
| FGG     | 25 | 13.25 | 10.75 | 6.16 | 2.12E-03 | 8.17E-02 |
| KRT8    | 25 | 13.24 | 10.76 | 6.15 | 2.14E-03 | 8.17E-02 |
| CES1C   | 25 | 13.19 | 10.81 | 6.11 | 2.22E-03 | 8.23E-02 |
| CSRP1   | 25 | 13.18 | 10.82 | 6.09 | 2.25E-03 | 8.23E-02 |
| TGM2    | 25 | 13.16 | 10.84 | 6.07 | 2.29E-03 | 8.23E-02 |
| MFAP2   | 25 | 13.13 | 10.87 | 6.04 | 2.34E-03 | 8.26E-02 |
| VWA1    | 25 | 13.00 | 11.00 | 5.91 | 2.62E-03 | 9.05E-02 |
| NPEPL1  | 25 | 12.96 | 11.04 | 5.87 | 2.71E-03 | 9.18E-02 |
| RUVBL2  | 25 | 12.93 | 11.07 | 5.84 | 2.78E-03 | 9.25E-02 |
| MUG1    | 25 | 12.89 | 11.11 | 5.80 | 2.89E-03 | 9.32E-02 |
| EPB41   | 25 | 12.88 | 11.12 | 5.79 | 2.90E-03 | 9.32E-02 |
| GNS     | 25 | 12.74 | 11.26 | 5.66 | 3.25E-03 | 1.02E-01 |
| CHCHD6  | 25 | 12.73 | 11.27 | 5.65 | 3.29E-03 | 1.02E-01 |
| KLK1    | 25 | 12.71 | 11.29 | 5.63 | 3.34E-03 | 1.02E-01 |
| CGN     | 25 | 12.67 | 11.33 | 5.59 | 3.44E-03 | 1.02E-01 |
| MUP3    | 25 | 12.66 | 11.34 | 5.59 | 3.47E-03 | 1.02E-01 |
| PLEC    | 25 | 12.62 | 11.38 | 5.55 | 3.59E-03 | 1.04E-01 |
| LAMA2   | 25 | 12.56 | 11.44 | 5.49 | 3.77E-03 | 1.08E-01 |
| MEP1B   | 25 | 12.51 | 11.49 | 5.45 | 3.92E-03 | 1.09E-01 |
| KANK3   | 25 | 12.51 | 11.49 | 5.44 | 3.93E-03 | 1.09E-01 |
| MYH10   | 25 | 12.49 | 11.51 | 5.42 | 4.00E-03 | 1.09E-01 |
| KRT23   | 25 | 12.47 | 11.53 | 5.41 | 4.06E-03 | 1.09E-01 |
| COL7A1  | 25 | 12.44 | 11.56 | 5.38 | 4.16E-03 | 1.09E-01 |
| PHPT1   | 25 | 12.43 | 11.57 | 5.37 | 4.18E-03 | 1.09E-01 |
| EMILIN1 | 25 | 12.38 | 11.62 | 5.33 | 4.36E-03 | 1.12E-01 |
| VIM     | 25 | 12.33 | 11.67 | 5.28 | 4.53E-03 | 1.15E-01 |
| CES2C   | 25 | 12.27 | 11.73 | 5.23 | 4.75E-03 | 1.19E-01 |
| FLNA    | 25 | 12.24 | 11.76 | 5.20 | 4.88E-03 | 1.20E-01 |
| PM20D1  | 25 | 12.21 | 11.79 | 5.18 | 4.96E-03 | 1.21E-01 |
| HPX     | 25 | 12.19 | 11.81 | 5.16 | 5.06E-03 | 1.21E-01 |

|         |    |       |       |      |          |          |
|---------|----|-------|-------|------|----------|----------|
| DHX9    | 25 | 12.16 | 11.84 | 5.14 | 5.16E-03 | 1.22E-01 |
| ACTN1   | 25 | 12.10 | 11.90 | 5.08 | 5.43E-03 | 1.27E-01 |
| HNRNPAB | 25 | 12.05 | 11.95 | 5.04 | 5.63E-03 | 1.29E-01 |
| PECR    | 25 | 12.05 | 11.95 | 5.04 | 5.65E-03 | 1.29E-01 |
| ANK1    | 25 | 12.03 | 11.97 | 5.02 | 5.74E-03 | 1.29E-01 |
| AMACR   | 25 | 11.99 | 12.01 | 4.99 | 5.90E-03 | 1.31E-01 |
| ACOX2   | 25 | 11.95 | 12.05 | 4.96 | 6.07E-03 | 1.31E-01 |
| ECI3    | 25 | 11.94 | 12.06 | 4.95 | 6.11E-03 | 1.31E-01 |
| H3C1    | 25 | 11.93 | 12.07 | 4.94 | 6.20E-03 | 1.31E-01 |
| KNG1    | 25 | 11.92 | 12.08 | 4.94 | 6.21E-03 | 1.31E-01 |
| PGD     | 25 | 11.87 | 12.13 | 4.89 | 6.47E-03 | 1.35E-01 |
| LAMA3   | 25 | 11.84 | 12.16 | 4.87 | 6.60E-03 | 1.35E-01 |
| ANXA2   | 25 | 11.84 | 12.16 | 4.87 | 6.63E-03 | 1.35E-01 |
| LUC7L2  | 25 | 11.78 | 12.22 | 4.82 | 6.90E-03 | 1.39E-01 |
| CAPG    | 25 | 11.77 | 12.23 | 4.82 | 6.95E-03 | 1.39E-01 |
| KLC4    | 25 | 11.75 | 12.25 | 4.79 | 7.10E-03 | 1.39E-01 |
| ACY1    | 25 | 11.74 | 12.26 | 4.79 | 7.12E-03 | 1.39E-01 |
| PCBP1   | 25 | 11.71 | 12.29 | 4.77 | 7.27E-03 | 1.41E-01 |
| H1.1    | 25 | 11.69 | 12.31 | 4.75 | 7.41E-03 | 1.42E-01 |
| KRT20   | 25 | 11.63 | 12.37 | 4.70 | 7.71E-03 | 1.46E-01 |
| PDLIM7  | 25 | 11.58 | 12.42 | 4.67 | 8.00E-03 | 1.49E-01 |
| UACA    | 25 | 11.58 | 12.42 | 4.66 | 8.02E-03 | 1.49E-01 |
| ITGB1   | 25 | 11.56 | 12.44 | 4.65 | 8.14E-03 | 1.49E-01 |
| MTA2    | 25 | 11.54 | 12.46 | 4.63 | 8.28E-03 | 1.49E-01 |

**Supplemental Table S2: Top 100 significantly different proteins among treatment groups**

| Protein   | obs.tot | sumsq.between | sumsq.within | statistic | pvalue   | fdr      |
|-----------|---------|---------------|--------------|-----------|----------|----------|
| MBNL2     | 15      | 10.04         | 5.03         | 11.97     | 1.39E-03 | 2.26E-01 |
| KRT23     | 15      | 9.21          | 4.76         | 11.62     | 1.56E-03 | 2.34E-01 |
| GRSF1     | 15      | 10.27         | 6.83         | 9.02      | 4.06E-03 | 5.54E-01 |
| RPL7      | 15      | 7.91          | 5.37         | 8.84      | 4.37E-03 | 5.54E-01 |
| H1.4      | 15      | 4.83          | 3.33         | 8.70      | 4.62E-03 | 5.54E-01 |
| NOP58     | 15      | 9.04          | 6.41         | 8.46      | 5.10E-03 | 5.73E-01 |
| ANK1      | 15      | 7.15          | 5.38         | 7.97      | 6.27E-03 | 6.22E-01 |
| FILIP1L   | 15      | 6.63          | 5.04         | 7.90      | 6.47E-03 | 6.22E-01 |
| AKR1C18   | 15      | 7.81          | 5.96         | 7.86      | 6.58E-03 | 6.22E-01 |
| H1.2      | 15      | 4.69          | 3.64         | 7.73      | 6.98E-03 | 6.22E-01 |
| EPB41     | 15      | 12.05         | 9.47         | 7.63      | 7.26E-03 | 6.22E-01 |
| ITGA1     | 15      | 4.68          | 3.90         | 7.19      | 8.84E-03 | 6.35E-01 |
| MACROH2A1 | 15      | 5.74          | 5.02         | 6.86      | 1.03E-02 | 6.35E-01 |
| KRT1      | 15      | 6.74          | 5.99         | 6.76      | 1.08E-02 | 6.35E-01 |
| RAB11FIP3 | 15      | 8.30          | 7.45         | 6.68      | 1.12E-02 | 6.35E-01 |
| PCBP1     | 15      | 7.11          | 6.42         | 6.65      | 1.14E-02 | 6.35E-01 |
| H1.5      | 15      | 3.92          | 3.55         | 6.63      | 1.15E-02 | 6.35E-01 |
| CBS       | 15      | 7.54          | 6.86         | 6.59      | 1.17E-02 | 6.35E-01 |
| H3C1      | 15      | 7.98          | 7.63         | 6.28      | 1.36E-02 | 6.35E-01 |
| FERMT2    | 15      | 2.44          | 2.34         | 6.24      | 1.39E-02 | 6.35E-01 |
| H2BC3     | 15      | 6.19          | 6.16         | 6.03      | 1.54E-02 | 6.35E-01 |
| CAPN2     | 15      | 8.00          | 8.00         | 6.00      | 1.56E-02 | 6.35E-01 |
| SPTA1     | 15      | 2.34          | 2.41         | 5.84      | 1.70E-02 | 6.35E-01 |
| SEC62     | 15      | 5.79          | 5.97         | 5.83      | 1.71E-02 | 6.35E-01 |
| DBT       | 15      | 9.49          | 9.90         | 5.75      | 1.77E-02 | 6.35E-01 |
| PGD       | 15      | 8.39          | 8.82         | 5.71      | 1.81E-02 | 6.35E-01 |
| ICAM1     | 15      | 5.32          | 5.59         | 5.71      | 1.81E-02 | 6.35E-01 |
| SART1     | 15      | 7.73          | 8.25         | 5.63      | 1.89E-02 | 6.35E-01 |
| H2BC7     | 15      | 4.58          | 4.90         | 5.60      | 1.91E-02 | 6.35E-01 |
| HBA       | 15      | 3.71          | 4.02         | 5.54      | 1.98E-02 | 6.35E-01 |
| DMTN      | 15      | 6.86          | 7.48         | 5.50      | 2.01E-02 | 6.35E-01 |
| CDH16     | 15      | 8.11          | 8.96         | 5.43      | 2.09E-02 | 6.35E-01 |
| KRT10     | 15      | 6.42          | 7.10         | 5.43      | 2.10E-02 | 6.35E-01 |
| DLAT      | 15      | 5.35          | 5.92         | 5.42      | 2.10E-02 | 6.35E-01 |
| SORD      | 15      | 8.26          | 9.25         | 5.36      | 2.17E-02 | 6.35E-01 |
| HSP90AB1  | 15      | 8.32          | 9.56         | 5.22      | 2.34E-02 | 6.35E-01 |

|          |    |      |       |      |          |          |
|----------|----|------|-------|------|----------|----------|
| COL4A4   | 15 | 7.19 | 8.51  | 5.07 | 2.53E-02 | 6.35E-01 |
| HOGA1    | 15 | 7.42 | 8.85  | 5.03 | 2.59E-02 | 6.35E-01 |
| LRP2     | 15 | 8.80 | 10.57 | 5.00 | 2.64E-02 | 6.35E-01 |
| COPB2    | 15 | 6.47 | 7.79  | 4.99 | 2.66E-02 | 6.35E-01 |
| DDOST    | 15 | 6.26 | 7.58  | 4.96 | 2.69E-02 | 6.35E-01 |
| ATP6V1B2 | 15 | 9.08 | 10.99 | 4.95 | 2.70E-02 | 6.35E-01 |
| H1.3     | 15 | 5.16 | 6.29  | 4.92 | 2.75E-02 | 6.35E-01 |
| TOP1     | 15 | 6.98 | 8.52  | 4.91 | 2.76E-02 | 6.35E-01 |
| CGN      | 15 | 4.79 | 5.89  | 4.88 | 2.82E-02 | 6.35E-01 |
| PDCD6IP  | 15 | 5.41 | 6.67  | 4.87 | 2.83E-02 | 6.35E-01 |
| EEF2     | 15 | 8.37 | 10.35 | 4.86 | 2.85E-02 | 6.35E-01 |
| PHYH     | 15 | 7.14 | 8.97  | 4.78 | 2.98E-02 | 6.35E-01 |
| TUBA4A   | 15 | 8.75 | 11.01 | 4.77 | 2.99E-02 | 6.35E-01 |
| UGDH     | 15 | 4.90 | 6.17  | 4.77 | 3.00E-02 | 6.35E-01 |
| RDX      | 15 | 5.59 | 7.06  | 4.75 | 3.02E-02 | 6.35E-01 |
| AP2M1    | 15 | 6.88 | 8.70  | 4.74 | 3.03E-02 | 6.35E-01 |
| DDX39B   | 15 | 3.66 | 4.64  | 4.73 | 3.06E-02 | 6.35E-01 |
| CCT7     | 15 | 7.90 | 10.07 | 4.71 | 3.09E-02 | 6.35E-01 |
| RPL19    | 15 | 4.55 | 5.80  | 4.71 | 3.09E-02 | 6.35E-01 |
| VIL1     | 15 | 9.15 | 11.69 | 4.70 | 3.11E-02 | 6.35E-01 |
| MLEC     | 15 | 5.48 | 7.00  | 4.70 | 3.12E-02 | 6.35E-01 |
| RPS3A    | 15 | 5.07 | 6.50  | 4.68 | 3.15E-02 | 6.35E-01 |
| RHOA     | 15 | 6.40 | 8.31  | 4.62 | 3.25E-02 | 6.35E-01 |
| ASS1     | 15 | 8.38 | 10.92 | 4.60 | 3.28E-02 | 6.35E-01 |
| ANK3     | 15 | 7.94 | 10.38 | 4.59 | 3.30E-02 | 6.35E-01 |
| CTTN     | 15 | 6.76 | 8.91  | 4.55 | 3.38E-02 | 6.35E-01 |
| TUFM     | 15 | 7.51 | 9.91  | 4.55 | 3.39E-02 | 6.35E-01 |
| RPS6     | 15 | 5.07 | 6.70  | 4.54 | 3.41E-02 | 6.35E-01 |
| KANK3    | 15 | 8.68 | 11.49 | 4.53 | 3.42E-02 | 6.35E-01 |
| IDH2     | 15 | 8.13 | 10.87 | 4.49 | 3.50E-02 | 6.35E-01 |
| IDH3A    | 15 | 5.10 | 6.86  | 4.46 | 3.56E-02 | 6.35E-01 |
| ENO1     | 15 | 6.06 | 8.17  | 4.45 | 3.58E-02 | 6.35E-01 |
| RPL8     | 15 | 5.27 | 7.19  | 4.40 | 3.68E-02 | 6.35E-01 |
| PALM     | 15 | 4.99 | 6.84  | 4.37 | 3.75E-02 | 6.35E-01 |
| CPT1A    | 15 | 9.10 | 12.53 | 4.36 | 3.78E-02 | 6.35E-01 |
| COL4A3   | 15 | 5.99 | 8.27  | 4.35 | 3.80E-02 | 6.35E-01 |
| MRPS21   | 15 | 6.09 | 8.42  | 4.34 | 3.82E-02 | 6.35E-01 |
| PC       | 15 | 8.90 | 12.37 | 4.32 | 3.87E-02 | 6.35E-01 |
| EIF2S3X  | 15 | 4.01 | 5.58  | 4.31 | 3.89E-02 | 6.35E-01 |

|        |    |      |       |      |          |          |
|--------|----|------|-------|------|----------|----------|
| FHL1   | 15 | 7.43 | 10.41 | 4.28 | 3.95E-02 | 6.35E-01 |
| RPL4   | 15 | 4.68 | 6.58  | 4.27 | 3.98E-02 | 6.35E-01 |
| HBB.B1 | 15 | 2.97 | 4.18  | 4.26 | 3.99E-02 | 6.35E-01 |
| GOLGA3 | 15 | 4.33 | 6.10  | 4.26 | 4.01E-02 | 6.35E-01 |
| GATD3  | 15 | 4.72 | 6.67  | 4.25 | 4.02E-02 | 6.35E-01 |
| B2M    | 15 | 5.79 | 8.19  | 4.24 | 4.04E-02 | 6.35E-01 |
| GSS    | 15 | 5.76 | 8.15  | 4.24 | 4.05E-02 | 6.35E-01 |
| PRDX2  | 15 | 7.00 | 9.95  | 4.22 | 4.09E-02 | 6.35E-01 |
| AMBP   | 15 | 4.77 | 6.80  | 4.21 | 4.12E-02 | 6.35E-01 |
| ALB    | 15 | 3.39 | 4.83  | 4.21 | 4.12E-02 | 6.35E-01 |
| PGK1   | 15 | 7.00 | 10.00 | 4.20 | 4.14E-02 | 6.35E-01 |
| KRT2   | 15 | 5.87 | 8.41  | 4.19 | 4.16E-02 | 6.35E-01 |
| RPL3   | 15 | 5.11 | 7.35  | 4.17 | 4.21E-02 | 6.35E-01 |
| RPL18  | 15 | 4.46 | 6.43  | 4.16 | 4.24E-02 | 6.35E-01 |
| HBA1   | 15 | 5.32 | 7.73  | 4.13 | 4.33E-02 | 6.35E-01 |
| PKLR   | 15 | 5.74 | 8.42  | 4.09 | 4.43E-02 | 6.35E-01 |
| PZP    | 15 | 0.92 | 1.36  | 4.06 | 4.51E-02 | 6.35E-01 |
| KLC4   | 15 | 7.27 | 10.78 | 4.05 | 4.53E-02 | 6.35E-01 |
| CENPV  | 15 | 4.00 | 5.94  | 4.04 | 4.56E-02 | 6.35E-01 |
| TTR    | 15 | 1.72 | 2.56  | 4.02 | 4.61E-02 | 6.35E-01 |
| ALDOB  | 15 | 7.65 | 11.43 | 4.02 | 4.62E-02 | 6.35E-01 |
| MIOX   | 15 | 6.77 | 10.12 | 4.01 | 4.62E-02 | 6.35E-01 |
| VCAM1  | 15 | 4.46 | 6.69  | 4.00 | 4.67E-02 | 6.35E-01 |
| HADHB  | 15 | 7.38 | 11.09 | 3.99 | 4.68E-02 | 6.35E-01 |
| FASN   | 15 | 7.26 | 10.93 | 3.99 | 4.70E-02 | 6.35E-01 |

**Supplemental Table 3: Proteome wide correlations with functional outcomes**

|          | tGFR_28day | NGAL_28day | BUN_24hr | BUN_28day | Cr_24hr | Cr_28day | CystatinC |
|----------|------------|------------|----------|-----------|---------|----------|-----------|
| DLAT     | 0.16       | -0.12      | 0.53     | 0.06      | 0.29    | 0.26     | 0.36      |
| TTR      | 0.42       | -0.26      | 0.53     | -0.05     | 0.38    | 0.41     | 0.65      |
| ALB      | 0.11       | -0.32      | 0.58     | 0.09      | 0.35    | 0.43     | 0.68      |
| FBN1     | -0.49      | 0.10       | 0.48     | 0.51      | 0.76    | 0.27     | 0.37      |
| COL12A1  | -0.48      | 0.16       | 0.49     | 0.51      | 0.74    | 0.34     | 0.40      |
| KRT19    | -0.35      | 0.10       | 0.26     | 0.44      | 0.60    | 0.35     | 0.29      |
| UMOD     | -0.34      | 0.08       | 0.49     | 0.45      | 0.71    | 0.31     | 0.47      |
| COL5A1   | -0.28      | 0.20       | 0.39     | 0.43      | 0.73    | 0.30     | 0.41      |
| H1.4     | -0.49      | -0.04      | 0.57     | 0.50      | 0.51    | 0.36     | 0.43      |
| PKLR     | -0.26      | -0.14      | 0.67     | 0.36      | 0.56    | 0.40     | 0.52      |
| CP       | 0.09       | -0.08      | 0.48     | 0.41      | 0.47    | 0.38     | 0.50      |
| AMBP     | -0.37      | 0.65       | -0.29    | 0.50      | 0.16    | 0.32     | -0.33     |
| APOA4    | -0.36      | 0.39       | -0.14    | 0.34      | 0.00    | 0.48     | -0.29     |
| SLC22A8  | 0.47       | 0.43       | -0.64    | 0.08      | -0.70   | -0.25    | -0.75     |
| NEDD4L   | -0.15      | 0.25       | -0.48    | -0.19     | -0.52   | -0.36    | -0.58     |
| MLYCD    | 0.19       | 0.03       | -0.62    | -0.29     | -0.65   | -0.27    | -0.50     |
| CYP4A12A | 0.34       | 0.24       | -0.52    | -0.30     | -0.47   | -0.49    | -0.49     |
| EPB41    | 0.68       | -0.35      | -0.16    | -0.50     | -0.37   | -0.07    | -0.07     |
| GK       | 0.66       | -0.22      | -0.15    | -0.70     | -0.68   | -0.40    | -0.28     |
| DAZAP1   | 0.66       | 0.15       | -0.12    | -0.19     | -0.15   | -0.06    | -0.05     |
| SPTA1    | 0.65       | -0.70      | 0.32     | -0.48     | -0.09   | 0.02     | 0.50      |
| PLEKHA6  | 0.64       | 0.42       | -0.36    | -0.06     | -0.29   | 0.17     | -0.35     |
| NPEPL1   | -0.32      | -0.19      | 0.60     | -0.19     | 0.34    | -0.24    | 0.37      |
| PLG      | -0.09      | 0.08       | 0.55     | 0.22      | 0.51    | 0.46     | 0.68      |
| IGFBP7   | -0.56      | 0.22       | 0.51     | 0.50      | 0.81    | 0.44     | 0.48      |
| CAPG     | -0.23      | 0.23       | 0.45     | 0.46      | 0.79    | 0.54     | 0.48      |
| DPYSL3   | -0.38      | 0.27       | 0.34     | 0.56      | 0.75    | 0.45     | 0.43      |
| TPM2     | -0.20      | -0.03      | 0.12     | 0.53      | 0.43    | 0.71     | 0.17      |
| GIGYF2   | 0.14       | 0.14       | 0.08     | 0.13      | 0.21    | 0.70     | 0.28      |
| MRPS22   | -0.17      | 0.09       | 0.19     | 0.02      | 0.34    | 0.70     | 0.32      |
| CTSZ     | -0.07      | 0.15       | 0.33     | 0.36      | 0.65    | 0.69     | 0.41      |
| LTBP4    | -0.27      | 0.24       | 0.13     | 0.73      | 0.64    | 0.42     | 0.15      |
| NQO1     | -0.25      | 0.33       | -0.03    | 0.71      | 0.41    | 0.54     | 0.00      |
| FBLN7    | -0.50      | 0.31       | 0.07     | 0.66      | 0.50    | 0.24     | -0.08     |
| H1.1     | -0.58      | 0.16       | 0.27     | 0.65      | 0.57    | 0.24     | 0.19      |
| CORO1A   | -0.36      | 0.22       | 0.37     | 0.62      | 0.76    | 0.50     | 0.43      |

|        |       |       |       |       |       |       |       |
|--------|-------|-------|-------|-------|-------|-------|-------|
| NUP43  | 0.15  | 0.64  | -0.26 | 0.45  | 0.13  | 0.26  | -0.21 |
| NDUFA5 | -0.37 | 0.64  | -0.12 | 0.34  | 0.09  | 0.18  | -0.19 |
| RPL10  | -0.09 | 0.64  | 0.01  | 0.00  | 0.08  | 0.05  | 0.01  |
| UQCRH  | -0.02 | 0.59  | -0.16 | 0.10  | -0.06 | 0.18  | -0.11 |
| ANK1   | 0.64  | -0.57 | 0.17  | -0.43 | -0.24 | -0.15 | 0.39  |
| COL4A2 | -0.04 | -0.10 | 0.54  | 0.07  | 0.38  | 0.02  | 0.47  |
| TNC    | -0.56 | 0.22  | 0.36  | 0.57  | 0.75  | 0.34  | 0.31  |
| RNH1   | 0.05  | 0.12  | 0.16  | 0.16  | 0.42  | 0.69  | 0.25  |
| BAIAP2 | 0.11  | 0.56  | -0.39 | 0.23  | -0.28 | 0.02  | -0.36 |
| DAB2   | 0.63  | 0.03  | -0.30 | -0.22 | -0.34 | 0.19  | -0.29 |
| F2     | -0.07 | -0.16 | 0.54  | 0.31  | 0.53  | 0.76  | 0.73  |
| KRT20  | -0.57 | 0.11  | 0.38  | 0.60  | 0.75  | 0.37  | 0.41  |
| DCPS   | 0.15  | -0.14 | 0.39  | 0.27  | 0.32  | 0.66  | 0.43  |
| CAPNS1 | -0.13 | 0.43  | 0.27  | 0.60  | 0.61  | 0.15  | 0.20  |
| ACOT8  | -0.12 | 0.56  | -0.44 | 0.25  | -0.20 | 0.11  | -0.58 |
